# Supplementary material
Source: PubMed Central journal article supplement (PMC4429930)
Supplement: NIHMS677629-supplement-1.pdf [file NIHMS677629-supplement-1.pdf]

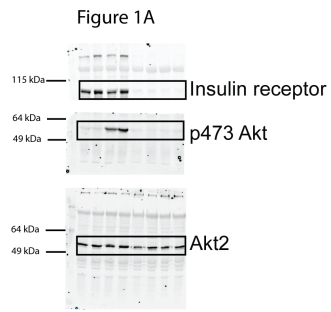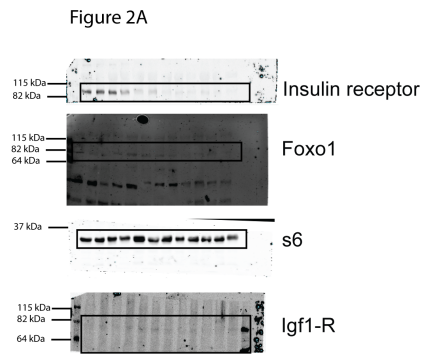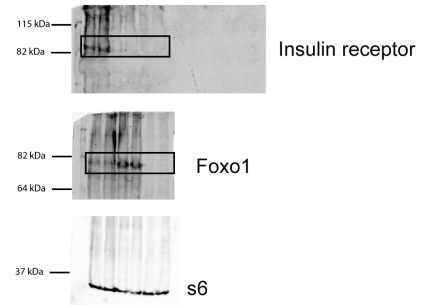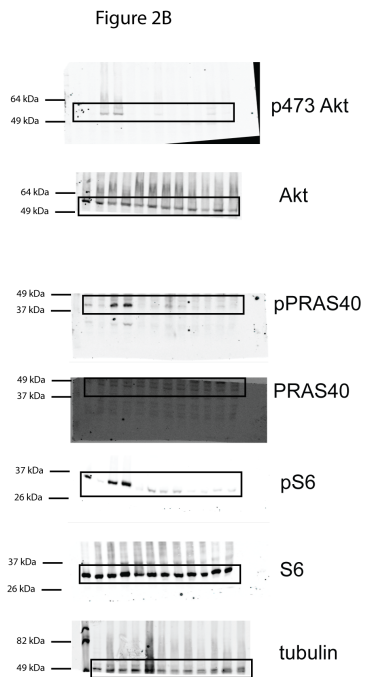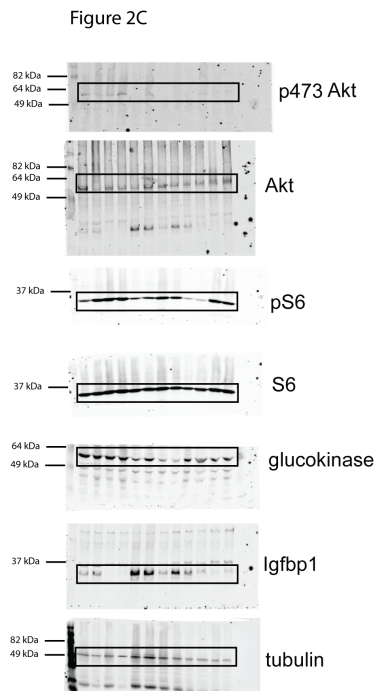

**Supplementary Figure 1. Original complete scans of key immunoblots presented in manuscript. Note that the data shown in manuscript is boxed.**

| <b>Gene Name</b> | <b>Forward</b>           | <b>Reverse</b>           |
|------------------|--------------------------|--------------------------|
| <i>TBP</i>       | cccttgtagccttcaccaat     | gaagctgcggtacaattccag    |
| <i>Srebp1c</i>   | atgtgcgaactggacacagcg    | acggagccatggattgcacattg  |
| <i>Gck</i>       | gaagacctgaagaaggtgatgagc | gtctatgtcttcgtgcttacagg  |
| <i>G6pc</i>      | atgaacatttccatgactttggg  | gacaggggaactgcttattatagg |
| <i>Pck1</i>      | cataacggctctggacttctctgc | gaatgggatgacatacatggtgcg |
| <i>FoxO1</i>     | gegtgcctacttcaaggataa    | tcagttccttcattctgcact    |
| <i>Igfbp1</i>    | cagatttctcggcctgcagg     | ctgctcctctgtcatctctgg    |
| <i>Irs2</i>      | ctgcgtcctctcccaaagtg     | ggggtcatggcatgtagc       |

**Supplementary Table 1. Complete primer sequences used for gene expression analysis.**
